1 **A class I hydrophobin in *Trichoderma virens* influences plant-microbe interactions through**  
2 **enhancement of enzyme activity and MAMP recognition**

3 **James T. Taylor, Inna Krieger, Frankie K. Crutcher, Pierce Jamieson, Benjamin A. Hor-**  
4 **witz, Michael V. Kolomiets, Charles M. Kenerley**

5 **Abstract**

6 The filamentous fungus, *Trichoderma virens*, is a well-known mycoparasitic plant symbiont, val-  
7 ued for its biocontrol capabilities. *T. virens* initiates a symbiotic relationship with a plant host  
8 through the colonization of its roots. To achieve colonization, the fungus must communicate with  
9 the host and evade its innate defenses. Hydrophobins from *Trichoderma spp.* have previously been  
10 demonstrated to be involved in colonization of host roots. In this study, the class I hydrophobin,  
11 HFB9A from *T. virens* was characterized for a potential role in root colonization.  $\Delta$ hfb9a gene  
12 deletion mutants colonized less than the wild-type strain, were unable to induce systemic resistance  
13 against *Colletotrichum graminicola*, and showed a reduction in the activity of its cell wall degrad-  
14 ing enzymes. The purified HFB9A protein was able to complement the enzyme activity of mutant  
15 culture filtrates as well as enhance the activity of commercially sourced cellulase. When exoge-  
16 nously applied to Arabidopsis plants, HFB9A protein induced phosphorylation of AtMAPK3/6,  
17 suggesting that it functions as a microbe-associated molecular pattern.

18 **Keywords**

19 *Trichoderma virens*, Induced Systemic Resistance, Root Colonization, Hydrophobins, Plant-Mi-  
20 crobe interactions

21 **Introduction**

22 The filamentous plant symbiotic fungus *Trichoderma virens* is recognized for its ability to  
23 colonize plant roots and provide benefits to its hosts through the induction of systemic resistance,

24 protection against fungal root pathogens, and growth promotion (Howell, 1987; Pieterse *et al.*,  
25 2014; Saldajeno *et al.*, 2014). During the colonization process, a large number of secreted fungal  
26 proteins are involved in the subroutines of evading the plant defenses, initially penetrating roots,  
27 and fungal growth within the root system by hyphal expansion (Djonović *et al.*, 2006a; Crutcher  
28 *et al.*, 2015; Lamdan *et al.*, 2015). In addition to fungal proteins that are secreted into intercellular  
29 spaces, others localize to the outer cell wall of the fungus. Here, they can serve a wide variety of  
30 functions such as receptors for specific stimuli, protect against antimicrobial compounds, and aid  
31 in physical interactions including attachment to surfaces (Zampieri *et al.*, 2010; Bignell, 2012;  
32 Kim *et al.*, 2016; Correia *et al.*, 2017). Much effort has been extended to discover and understand  
33 proteins involved in *Trichoderma*-plant interactions, with a major emphasis on small, secreted  
34 cysteine-rich proteins hypothesized to function as effectors (Lamdan *et al.*, 2015; Morán-Diez *et*  
35 *al.*, 2015; Guzmán-Guzmán *et al.*, 2017; Ramírez-Valdespino *et al.*, 2019). The best-known ex-  
36 ample of this type of protein is SM1, which belongs to the cerato-platanin family and is required  
37 for induced systemic resistance (ISR) mediated by *T. virens* (Djonović *et al.*, 2006a; Djonović *et*  
38 *al.*, 2007). In sharp contrast, the role of other secreted protein families in *Trichoderma*-plant inter-  
39 actions are much less understood. Of these families, hydrophobin proteins are of particular interest  
40 due to their diverse suite of functions.

41 Hydrophobins are small cysteine-rich, secreted proteins that self-assemble at hydro-  
42 philic/hydrophobic interfaces (Wösten, 2001) and are unique to fungi. They contain a conserved  
43 motif of cysteine residues, which they may act as effectors involved in plant-fungal interactions,  
44 similarly to other cysteine-rich proteins (Ruocco *et al.*, 2015; Guzmán-Guzmán *et al.*, 2017). As  
45 secreted proteins, some hydrophobins cover the surface of spores of fungal pathogens, helping to  
46 evade host defenses (Bayry *et al.*, 2012). Others aid fungal morphogenesis by enabling hyphae to

47 penetrate air/water interfaces (Wösten and de Vocht, 2000). The unique properties of hydro-  
48 phobins are suited for a variety of applications in industrial and scientific techniques. The fusion  
49 of a hydrophobin to a protein of interest can significantly boost the yield of the purified protein  
50 (Joensuu *et al.*, 2010; Mustalahti *et al.*, 2013). Hydrophobins are also industrially used as emulsi-  
51 fiers and agents to alter surface characteristics of substrates (Bayry *et al.*, 2012).

52 Hydrophobins are currently organized into two classes (I and II) based on solubility, the  
53 spacing between cysteines, and hydrophobicity patterns in the amino acid sequence (Wösten,  
54 2001). Class II hydrophobins are more soluble than class I and have more conserved spacing be-  
55 tween cysteines, whereas class I hydrophobins are very insoluble, requiring harsh acids to dissolve,  
56 and can have highly variable cysteine spacing (Wösten and De Vocht, 2000; Wösten, 2001; Bayry  
57 *et al.*, 2012). Class I hydrophobins typically localize to the outer cell wall of fungal hyphae and/or  
58 spores where they form monolayers or self-assemble into amyloid-like fibrils. This differs from  
59 class II hydrophobins, which tend to be freely secreted into the environment. A limited number of  
60 hydrophobins from *Trichoderma* species have been functionally characterized. A class I hydro-  
61 phobin, TASHYD1 from *T. asperellum*, was found to aid in the attachment of conidia and hyphae  
62 to roots for more efficient colonization of cucumber plants (Viterbo and Chet, 2006). A class II  
63 hydrophobin, HYTLO1 from *T. longibrachiatum*, was shown to exhibit direct antifungal effects  
64 and induce systemic resistance when applied to plant leaves (Ruocco *et al.*, 2015). Additionally, a  
65 class II hydrophobin from *T. virens* was demonstrated to have a role in root colonization and my-  
66 coparasitism activity (Guzmán-Guzmán *et al.*, 2017). Class I hydrophobins have been identified  
67 in *T. virens*, but are fewer in number (three) than class II hydrophobins (eight), and no distinctive  
68 role in plant interactions has been demonstrated (Seidl-Seiboth *et al.*, 2011). One class I hydro-  
69 phobin, HFB9A from *T. virens*, has been described that shares significant homology with

70 TASHYD1 (Viterbo and Chet, 2006). Based on this homology and the typical characteristics of  
71 hydrophobins, we hypothesized that HFB9A has a role in *T. virens*-plant interactions. In this study,  
72 we demonstrate the function of the hfb9a gene in root colonization and induction of systemic re-  
73 sistance in maize as well as the enhancement of enzyme activity on cell wall components.

## 74 **Materials and Methods**

### 75 *Bioinformatic analysis*

76 The protein sequences of selected proteins were subjected to a BLAST search of the NCBI  
77 database for homologs. The resulting matches were aligned using CLUSTAL Omega software.  
78 Additionally, the DNA sequence of the promoter and terminator regions of the hydrophobin were  
79 queried through the Joint Genome Institute BLAST ([https://mycocosm.jgi.doe.gov/pages/blast-](https://mycocosm.jgi.doe.gov/pages/blast-query.jsf?db=TriviGv29_8_2)  
80 [query.jsf?db=TriviGv29\\_8\\_2](https://mycocosm.jgi.doe.gov/pages/blast-query.jsf?db=TriviGv29_8_2)) search of the *T. virens* Gv29-8 genome.

### 81 *Strains and conditions*

82 The root pathogens, *Pythium ultimum* and *Rhizoctonia solani*, and the wild-type strain of  
83 *T. virens* [Gv29-8] were maintained on potato dextrose agar (PDA, BD Difco™) at 27 °C. The  
84 maize foliar pathogen *Colletotrichum graminicola* was maintained under an 14:10 light:dark light  
85 regime at room temperature on PDA plates for sporulation. Chlamydospores of *T. virens* were  
86 harvested from 14-day old cultures of *T. virens* grown in Fernbach flasks containing 1 L of molas-  
87 ses medium (30g molasses and 5g yeast extract per liter of water) by vacuum filtration and dried  
88 overnight. The dried chlamydospore mats were ground in a Wiley mill with a #60 sieve. *Zea mays*  
89 (Silver queen hybrid, Burpee) were grown in plastic cone containers in Metromix soilless medium  
90 or in a hydroponic system (Lamdan *et al.*, 2015). The hydroponic system consisted of mason jars  
91 (500ml, wide mouth) with a shaker clamp placed inside. The jar was filled to the top of the clamp

92 (~220ml) with 0.5x Murashige-Skoog basal medium containing Gamborg's vitamins and supple-  
93 mented with 0.5% sucrose. The unit was covered with a glass petri dish bottom and autoclaved.  
94 Plastic mesh (7 holes/linear inch) previously cut into discs to fit within the jars was autoclaved  
95 separately. After sterilization, the mesh discs were placed on top of the clamps, and pregerminated  
96 seeds with roots approximately 2 cm long were threaded through the mesh to contact the growth  
97 medium. The glass petri dish bottoms were replaced with sterile plastic petri dish bottoms, as they  
98 ensure a tighter fit. All plants were grown under lamps (Sun Blaze T5) with 6500K and 3000K  
99 lights at room temperature under a 14:10 light:dark regime.

#### 100 *RNA isolation and Expression assays*

101 Total RNA was extracted from cultures of *T. virens* grown in potato dextrose broth (PDB,  
102 BD Difco™) that were inoculated with approximately  $3 \times 10^9$  conidia. The fungal biomass was  
103 collected every 24 hr over the course of 7 days. To determine the expression of *hfb9a* in plant-  
104 fungal interactions, *T. virens* was grown in a hydroponic system in the presence of maize roots,  
105 and fungal tissue samples were collected at 6, 30, and 54 hr. All samples were extracted using the  
106 Direct-zol RNA miniprep kit (Zymo Research, USA) following manufacturer's instructions. Ex-  
107 tracted RNA was converted to cDNA using the high capacity cDNA reverse transcription kit (Ap-  
108 plied Biosystems) according to manufacturer's instructions. The resulting cDNA was analyzed by  
109 RT-PCR using gene specific primers and primers amplifying Histone H3 as a loading control  
110 (Supplementary Table 1). Raw read counts were obtained from previously performed RNA-seq  
111 transcriptomic studies (Taylor *et al.*, unpublished; Malinich *et al.*, 2019). The reads were normal-  
112 ized using the TMM algorithm in EdgeR. The normalized reads were then queried for those cor-  
113 responding to *hfb9a* and graphed using seaborn and matplotlib packages in python.

#### 114 *Deletion of hfb9a*

115           The hfb9a gene was targeted for deletion through homologous recombination using a vec-  
116   tor generated via the OSCAR method (Paz *et al.*, 2011) modified for use in *T. virens*. Primers were  
117   designed to amplify approximately 1kb of upstream and downstream regions flanking the open  
118   reading frame of the gene and contained appropriate Gateway sites for recombination (Supple-  
119   mentary Table 1). The flanks amplified from *T. virens* genomic DNA were purified by adding 90  
120   μl of combined PCR product, 270 μl TE buffer, and 180 μl 30% PEG 8000/30mM MgCl<sub>2</sub> to a  
121   microfuge tube. This solution was vortexed thoroughly, and then centrifuged for 15 min at maxi-  
122   mum speed in the table-top centrifuge. The pellet was resuspended in 15 μl of sterile water. A 5  
123   μl clonase reaction was performed using 20 ng of combined flanks, 60 ng pA-Hyg-OSCAR, 60 ng  
124   pOSCAR, and 1 μl of BP clonase (Invitrogen) with incubation in a thermocycler overnight at 25  
125   °C. The reaction was stopped the next morning by adding 0.5 μl of proteinase K and incubating at  
126   37 °C for 10 min. The entire reaction was used to transform *E. coli* DH5α cells and positive clones  
127   were screened as described in Paz et al (2011).

128           The resulting vector (pHFB9a) was electroporated into *A. tumefaciens* AGL1 and con-  
129   firmed through colony PCR using primers to amplify both flanks and the hygromycin resistance  
130   gene (hph) (Supplementary Table 1). Overnight cultures of AGL1 containing the vector were pel-  
131   leted and resuspended to an OD<sub>600</sub> of 0.15 in induction medium (M9 minimal medium; 100 ml 5x  
132   M9 salts, 3.9g MES, 0.45g glucose, 0.25 ml glycerol, to 500 ml with H<sub>2</sub>O, pH 5.3) with and  
133   without 200 μM acetosyringone and allowed to incubate for 6 hr at 27 °C. Conidia of *T. virens*  
134   were collected from 4-day old PDA plates, diluted to 5x10<sup>5</sup> conidia/ml, and mixed with bacteria  
135   in a 1:1 ratio. Several sterile cellophane squares (~1cm<sup>2</sup>) were placed on co-cultivation plates (M9  
136   minimal medium with 500 μM acetosyringone and 1.5% agar) and 20 μl of the mixed conidia/bac-  
137   teria solution were placed on each square. The plates were allowed to incubate for 60 hr before

138 transferring the cellophane to PDA selection plates containing hygromycin, tetracycline, and chlo-  
139 ramphenicol. Positive transformants were transferred to 2 ml PDA slants containing the same an-  
140 tibiotics. Once cultures began to sporulate, they were successively transferred to PDA + antibiot-  
141 ics, PDA, and back to PDA + antibiotics to ensure stability of the integration. Stable transformants  
142 were grown in PDB for 2 days and genomic DNA extracted for PCR analysis. Primers specific to  
143 the ORF of the gene and primers outside the 5' flank and inside of hph were used to confirm  
144 deletion.

#### 145 *Phenotypic analysis of mutants*

146 Two mutants and the wild-type were assayed for differences in general morphology and  
147 radial growth rate by plating a 3 mm radius plug of actively growing fungus on four PDA plates  
148 each and measured every day for four days. The strains were also tested for differences in myco-  
149 parasitic ability in confrontation with *P. ultimum*. Plugs of each fungus were placed on opposite  
150 sides of a PDA plate 1 cm away from the edge of the plate and allowed to grow toward each other  
151 for seven days. The length of the growth front of wild-type or mutants was measured from the plug  
152 and recorded for comparison. Each experiment was repeated twice with four independent plates  
153 per experiment. Biocontrol activity was measured as in Djonović et al. using *R. solani* as the path-  
154 ogen rather than *P. ultimum* (Djonović et al., 2006b). Contact angle measurement was performed  
155 as in Crutcher et al. (Crutcher et al., 2015).

#### 156 *Oxidative stress assay*

157 Oxidative stress tolerance was measured by growth on VMS agar plates containing 10  $\mu$ M  
158 sodium menadione bisulfite. Agar plugs (3 mm radius) of each strain were placed in the middle of  
159 the plates. Radial growth was measured every 24 hr for three days.

#### 160 *Root colonization and Induced Systemic Resistance assays*

161 Maize seedlings were grown in a hydroponic system as described previously. Once the  
162 roots had reached sufficient length (approx. 3-5 cm), 1 g of tissue from wild-type or mutant *T.*  
163 *virens* strains was placed in the liquid growth medium and gently stirred to distribute. The seed-  
164 lings and fungal biomass were incubated for 3 days shaking at 50 rpm. The roots were then har-  
165 vested and thoroughly rinsed in tap water. The collected roots were ground in liquid nitrogen and  
166 genomic DNA was extracted using the same protocol described above. The samples were analyzed  
167 via the  $\Delta\Delta C_t$  method of qPCR with actin and phenylalanine ammonia lyase primers to determine  
168 the ratio of fungal to maize DNA, respectively (Crutcher et al. 2013). The maize samples were  
169 treated as the endogenous control and the WT:Maize DNA ratio was normalized to one relative  
170 abundance unit and used as the basis of comparison. Mutants were investigated for changes in ISR  
171 activity against the foliar pathogen *C. graminicola* following the protocol of Djonović et al.  
172 (Djonović *et al.*, 2007) using Silver Queen hybrid plants instead of the B73 inbred line. The area  
173 of individual lesions was measured using ImageJ (Schneider *et al.*, 2012). *C. graminicola* was  
174 utilized due to its status as a top maize pathogen and the consistency of the lesions that it causes.  
175 The shoot height of treated plants was measured with a meter stick after removing the plants from  
176 the plastic cone containers starting at the seed and ending at the longest leaf tip after straightening.  
177 After shoot measurements, the roots of the plants were cleaned under running water to remove  
178 attached soil and dried in an oven overnight. The combined dry weight of roots and shoots from  
179 each plant was recorded.

#### 180 *Confocal microscopy and staining*

181 Colonized sections of roots harvested from the hydroponic system after two days incuba-  
182 tion with strains of *T. virens* were cleared by treatment with 10% KOH for 1 hour at 95C. The  
183 samples were equilibrated in PBS (pH 7.4) for 1 hour. The equilibrated samples were infiltrated in



184 a solution of 5 mg/ml WGA-Alexa-fluor 488 and 10 mg/ml propidium iodide in PBS (pH 7.4) for  
185 15 min under vacuum and destained in PBS for an additional 15 min. The stained samples were  
186 immediately visualized on an Olympus FV3000 confocal microscope.

#### 187 *Enzymatic activity assay of cell wall degrading enzymes*

188 Six replicates of 3 mm radius plugs of each strain were grown in 2 ml of VMS broth in a  
189 24 well plate for 48 hr at 27°C. A 150 µl sample of broth from each well was added to a PCR tube  
190 along with 150 µl of Bradford reagent and incubated at room temperature for 5 min. To determine  
191 total protein concentrations, the absorbance of the samples was measured at 595 nm and compared  
192 to absorbance values of a standard BSA curve. Samples from each well were diluted to a total  
193 protein concentration of 10 µg/ml. These diluted samples were used for enzyme activity assays.

194 To measure cellulolytic activity, 40 µl of each sample were transferred to a well of a 96  
195 well microplate and repeated for a total of 3 technical replicates per sample. A 60 µl aliquot of 50  
196 mM sodium acetate buffer at a pH of 4.8 was added to the well along with 10 µl of 1% carbox-  
197 ymethyl cellulose. The plate was sealed with adhesive film and incubated in a thermocycler at  
198 50°C for 60 min. A 50 µl aliquot of solution from each well was transferred to a new 96 well plate  
199 and 100 µl of dinitrosalicylic acid solution was added. The new plate was then incubated at 95°C  
200 for 5 min to allow color to develop, after which 40 µl of the developed solution was added to a 96  
201 well plate, diluted with 160 µl H<sub>2</sub>O, and absorbance measured at 540nm in a microplate reader.

202 To measure chitinase activity, 20 µl of sample was added to a well of a flat bottom 96 well  
203 plate. To this, 80 µl of the same sodium acetate buffer used above and 5 µl of 0.5 mg/ml 4-  
204 methylumbelliferyl β-D-N, N', N''-triacetylchitotrioside as a substrate was added. This mixture  
205 was incubated for 15 min at 40°C, and fluorescence was measured in a microplate reader.

#### 206 *Protein expression and extraction*

207 Primers were designed to amplify the 423 bp coding sequence from cDNA with *NdeI* and  
208 *HindIII* restriction sites prepended to the 5' and 3' primers, respectively (Supplementary Table 1).  
209 The amplicon and pET30b(+) were double digested with *NdeI* and *HindIII* for 30 min at 37°C.  
210 The digested products were cleaned with a QIAquick PCR cleanup kit (Qiagen, US) and ligated at  
211 a 3:1 amplicon:plasmid ratio with t4 DNA ligase (NEB, US) overnight at 16°C. A 5 µl aliquot of  
212 the ligase mix was transformed into DH5α competent cells via heat shock. Following a recovery  
213 period of one hour in SOC medium, 200 µl were plated on an LBA plate containing 50 µg/ml  
214 kanamycin and incubated overnight at 37°C. Resulting colonies were screened by PCR for ampli-  
215 fication of the ORF of hfb9a and positive colonies were digested with *NdeI* and *HindIII* to deter-  
216 mine insert size. Several vectors were then sequenced for confirmation of the correct insertion.

217 The confirmed vector was transformed into *E. coli* BL21(DE3) competent cells (Invitro-  
218 gen, USA) via heat shock. Four resulting colonies were inoculated into 3 ml of LB broth containing  
219 50 µg/ml kanamycin. The cultures were shaken at 225 rpm in a 37°C incubator until the OD<sub>600</sub>  
220 reached approximately 0.6 (roughly 5 hr). Expression was induced by adding 0.75 mM IPTG to  
221 the cultures with further incubation at 37°C for 4 hr. The cultures were transferred to 2 ml Eppen-  
222 dorf tubes and centrifuged for 5 min at 4500xg. The resulting pellet was washed with 500 µl of  
223 phosphate buffered saline (PBS, pH 7), and subsequently resuspended in 500 µl of PBS. The cells  
224 were lysed by repeated freeze-thaw cycles with liquid nitrogen. A 100 µl sample of the solution  
225 was collected in a 1.5 ml Eppendorf tube to represent the combined soluble and insoluble fractions  
226 of the lysate. The remainder was centrifuged for 5 min at full speed in a tabletop centrifuge. A 100  
227 µl sample was taken to represent the soluble fraction of the lysate. Each sample was diluted with  
228 gel loading buffer and placed in a boiling water bath for 5 min. 10 µl of each sample were loaded  
229 into a 15% SDS-PAGE gel and run at 35 mA for 1 hour.

230 To assess the presence of the protein of interest, a dot blot was performed using anti-His  
231 antibodies conjugated to alkaline phosphatase. For each sample, 3  $\mu$ l of each protein extract and a  
232 positive control were dotted onto a nitrocellulose membrane. After drying, the membrane was  
233 blocked using 5% skim milk powder in TTBS for 30 min. The membrane was rinsed briefly with  
234 TTBS, and the dilute antibody solution was added and allowed to incubate for 1 hour. The antibody  
235 solution was drained off, and the membrane was thoroughly rinsed with TTBS. The membrane  
236 was developed by adding 10 ml of BCIP/NBT (Sigma Aldrich, USA) solution to the membrane  
237 and incubating for 20 min.

238 An overnight culture of the expressing strain of *E. coli* was used to start a 2 L culture. The  
239 culture was centrifuged for 50 min at 16,000 rpm with the pellet resuspended in lysis buffer (20  
240 mM Tris pH 7.5, 100 mM NaCl) and 2 M urea. Then 25  $\mu$ l of 1 M  $MgCl_2$  and 25  $\mu$ l of DNaseI  
241 were added following resuspension, the solution was lysed using a French press, and centrifuged  
242 at 16,000 rpm for 50 min to obtain a pellet. The supernatant was decanted into a separate container  
243 for later testing. The pellet was washed twice by resuspending in lysis buffer + 2 M urea and spun  
244 at 16000 rpm for 20 min. The final pellet was resuspended in lysis buffer + 8 M urea. The suspen-  
245 sion was spun once more at 16,000 rpm for 20 min. The supernatant containing solubilized inclu-  
246 sion bodies was passed through a HisTrap HP (5 ml column volume, GE, USA) chromatography  
247 column using a peristaltic pump. The column was then attached to an FPLC where the bound  
248 proteins could be refolded by passing lysis buffer containing a slow gradient (20 column volumes)  
249 from 8 M to 0 M urea with 5 mM reduced glutathione and 0.5 mM oxidized glutathione. Following  
250 refolding, the protein was eluted by 0-400 mM imidazole gradient. The fractions were analyzed  
251 by SDS-PAGE gel, as well as subjected to a dot blot with anti-his antibodies to confirm the pres-  
252 ence of the recombinant protein.

253 *SM1 production determination*

254 Cultures of each strain were grown in 1 L VMS shaken at 150 rpm and 27C for one week.  
255 The cultures were filtered through Whatman #4 filter paper and the filtrate collected. Proteins were  
256 precipitated from the filtrate with ammonium sulfate (~80% saturation) and collected by centrifu-  
257 gation. Levels of SM1 production were determined by immunoblotting as in Djonovic *et al.* 2006a.

258 *Arabidopsis MAPK phosphorylation assay*

259 Arabidopsis seedlings were grown on plates of 0.5x Murashige-Skoog basal medium with  
260 Gamborg's vitamins for ten days. Several seedlings were placed in wells of a 12 well plate with  
261 500 ul of sterile water and incubated overnight. The seedlings were then treated with chitin, puri-  
262 fied HFB9A, the protein suspension buffer, or purified SM1. The proteins were added to a con-  
263 centration of 100 nM. After 15 or 30 min, the seedlings were collected, and flash frozen in liquid  
264 nitrogen. The frozen seedlings were ground in protein extraction buffer (Li *et al.*, 2015) and run  
265 on a 10% SDS-PAGE gel. The proteins were transferred and blotted with anti-pERK1/2 antibodies  
266 and detected by enhanced chemiluminescence.

267 *Statistical analysis*

268 All data was analyzed for statistical significance using the ANOVA, Tukey's HSD, and/or  
269 Kruskal-Wallis functions in R.

270 **Results**

271 *The T. virens genome encodes two canonical type I hydrophobins*

272 NCBI PSI-BLAST search using the protein sequence of HFB9A (Genbank Accession:  
273 EHK16816.1) revealed a characterized homolog in the *T. asperellum* genome, TASHYD1. A sec-  
274 ond similar hydrophobin was found in the *T. virens* genome that has not yet been characterized.  
275 With MEGA software, a phylogenetic tree was constructed using selected top hits of the NCBI

276 PSI-BLAST, with HFB9A serving as the query sequence (Figure 1). The tree diverged into two  
277 main clades representing proteins that were more similar to HFB9A or HFB3A. The only charac-  
278 terized hydrophobin in the phylogeny was TASHYD1, which clustered with HFB9A, indicating  
279 that the two proteins may share similar characteristics and roles in the fungus. Additionally, PFAM  
280 database scanning revealed a hydrophobin domain with an N-terminal signal peptide and no other  
281 conserved domains in the amino acid sequence. The protein sequence of HFB9A was used for  
282 homology modeling of protein structure with the I-TASSER software (Yang *et al.*, 2014). The  
283 predicted structure of HFB9A (Figure 2) shared structural homology with human defensin and cell  
284 adhesion proteins and was predicted to bind a peptide as a ligand. The structure of TASHYD1 was  
285 modeled using the same software. Both HFB9A and TASHYD1 successfully model as similar to  
286 the solved structure of DEWA from *Aspergillus nidulans* (Morris *et al.*, 2013) showing the similar  
287 core of beta-sheets, with the unique composition of the surface residues most likely responsible  
288 for the specific functions.

#### 289 *hfb9a* is induced during fungal association with maize roots

290 To develop an expression profile for *hfb9a*, cDNA generated from RNA of wild-type col-  
291 lected at predetermined time points either in the presence of living maize roots (6, 30, and 54 hpi)  
292 or in shaken culture of potato dextrose broth (PDB, collected every day for 7 days) was subjected  
293 to RT-PCR. Expression was observed only in samples from the hydroponic system collected 54 hr  
294 post inoculation, indicating expression of the gene between 30 and 54 hpi (Figure 3A). Expression  
295 of the gene from mycelial samples grown in PDB was not detected until 72 hpi but remained  
296 constant in the remainder of the samples. In the hydroponic system, attachment of the wild-type  
297 and each mutant to the root system of maize seedlings was recorded at approximately 6 hpi, with  
298 the entirety of the root system enveloped by fungus at 54 hpi. The initial expression results were

299 further confirmed by whole transcriptome sequencing data (Figure 3B, 3C, Malinich *et al.*, 2019,  
300 Taylor *et al. unpublished*). In early time points (6-24 hpi, Figure 3B, 3C), the normalized transcript  
301 counts are near 0, while starting at 30 hr post inoculation transcript counts rapidly increase.

### 302 *hfb9a is required for normal hydrophobicity and oxidative stress response*

303 The gene encoding HFB9A was deleted via *Agrobacterium*-mediated transformation with  
304 a homologous recombination cassette (Supplementary Figure 1A). The knockouts were confirmed  
305 and screened for wild-type copies of the gene by PCR (Supplementary Figure 1B). The  $\Delta hfb9a$   
306 mutants demonstrated a statistically significant difference in hyphal surface hydrophobicity as  
307 measured by contact angle of a water droplet on the surface of an agar plug ( $p < 0.05$ , Figure 4A).  
308 There was no significant difference in radial growth on PDA between the mutants and wild-type  
309 (Supplementary Figure 2). However, mutant strains grew significantly slower under oxidative  
310 stress than wild-type ( $p < 0.05$ , Figure 4B). The mutants grew similar as wild-type in confrontation  
311 with *P. ultimum* (Supplementary Figure 3A) and retained biocontrol activity against *R. solani* on  
312 cotton roots (Supplementary Figure 3B).

### 313 *hfb9a has a role in host root colonization and induction of systemic resistance*

314 The ability of  $\Delta hfb9a$  mutants to colonize maize roots was significantly reduced in the  
315 hydroponic system (Figure 5A). Observations prior to harvest indicated a similar amount of each  
316 strain enveloping the roots. Interestingly, upon addition of pregerminated fungal tissue to the hy-  
317 droponic medium, individual colonies could be seen attaching to the roots as the biomass became  
318 dispersed. This was significantly faster than expected and did not support our initial hypothesis  
319 that this hydrophobin was involved in attachment of the fungus to the roots. Additionally, visual-  
320 ization of the colonized roots by confocal microscopy indicated attachment to the root epidermis

321 by the mutant, but only wild-type was able to colonize internal portions of the root sections exten-  
322 sively (Figure 5B, 5C).

323 The  $\Delta hfb9a$  mutants were analyzed for their ability to induce systemic resistance against  
324 *C. graminicola* in maize plants. The average lesion area of the plants treated with  $\Delta hfb9a$  mutants  
325 were significantly larger than the wild-type treated plants, indicating a lack of ISR ( $p < 0.05$ , Figure  
326 6A, 6B). Plants treated with  $\Delta hfb9a$  mutants did not differ significantly in height or dry weight  
327 compared to wild-type treated plants (data not shown). Western blot analysis was performed to  
328 determine whether the reduction of ISR was due to decreased production of the elicitor protein  
329 SM1. Total protein was extracted from wild-type and  $\Delta hfb9a$  strains grown in PDB for 48 hr at  
330 150 rpm. Each aliquot was diluted to 1 mg/ml and a western blot performed using anti-SM1 anti-  
331 bodies (Djonović *et al.*, 2006a). There was no appreciable difference in the amount of protein  
332 detected (Figure 7).

### 333 *hfb9a accelerates T. virens cellulase and chitinase activity*

334 The  $\Delta hfb9a$  deletion mutants demonstrated approximately 90% less cellulase activity com-  
335 pared to the wild-type fungus (Figure 8A). To determine whether this effect was substrate specific,  
336 we duplicated the assay using colloidal chitin, pectin, and lignin. Chitinase activity on colloidal  
337 chitin was impacted by the loss of HFB9A (~95% reduction, Figure 8B). However, no impact on  
338 pectin or lignin degradation was found with this assay.

### 339 *HFB9A protein complements enzyme activity of mutants*

340 The *E. coli* expression vector pET30B(+) was used to produce recombinant HFB9A with  
341 a fused 6xHis tag at the C-terminal end. Expression following induction with IPTG was attempted  
342 at 30°C overnight or 37°C for four hr. Protein production was only detected with cultures incubated  
343 at 37°C and present only in the insoluble fraction of the lysate.

344           The recombinant HFB9A protein was purified from solubilized inclusion bodies by nickel  
345 affinity chromatography and refolded on the column. Following elution with imidazole, the frac-  
346 tions containing the protein of interest were identified with a dot blot. The positive fractions were  
347 pooled, assayed by western blotting (Figure 9), and the protein was stored at 4°C for future use.  
348 The protein was collected in a buffer with high salt and imidazole. We attempted to exchange the  
349 buffer by dialysis but found that the protein aggregated and precipitated out of solution. To avoid  
350 aggregation and the resulting insolubility, the protein was rapidly precipitated using 4 volumes of  
351 ice-cold acetone; however, the protein remained insoluble upon the reconstitution attempts. The  
352 protein was re-solubilized via treatment with formic acid followed by the addition of an equal  
353 volume of 30% H<sub>2</sub>O<sub>2</sub> to produce performic acid (Wosten *et al.*, 1993). The protein immediately  
354 went into solution following evaporation of the acid. The new protein solution retained the same  
355 surface activity in comparison with samples dissolved in the original buffer and was used through-  
356 out the rest of the study.

357           The purified protein was able to complement the cellulase activity of the mutants at 1 μM  
358 concentration. In addition to restoring the enzyme activity of the mutants to wild-type levels, ad-  
359 dition of purified protein to the wild-type culture filtrate was able to enhance the cellulolytic ac-  
360 tivity against filter paper (~25% increase, Figure 10A). The HFB9A protein on its own displays  
361 no enzymatic activity and requires culture filtrate to have this effect. The protein buffer was also  
362 tested to ensure that there was no interaction in this assay and found no cellulolytic activity. Ad-  
363 ditionally, the pure protein at 1 μM concentration was able to enhance the activity of commercially  
364 sourced cellulase by 13% compared to the untreated control (Figure 10B).

365 *hfb9a induces phosphorylation of AtMAPK 3 and 6*



366 Purified protein samples of HFB9A and SM1 were applied to Arabidopsis seedlings to  
367 determine whether the proteins could induce rapid activation of plant innate immunity commonly  
368 associated with microbe associated molecular patterns (MAMPs) by phosphorylation of  
369 AtMAPK3 and AtMAPK6. HFB9A treated samples displayed phosphorylation of AtMAPK3 and  
370 AtMAPK6 starting 30-min post inoculation, whereas SM1 and buffer control samples did not dis-  
371 play phosphorylation 15- or 30-min post inoculation (Figure 11).

## 372 Discussion

373 Hydrophobins are known to self-assemble at hydrophobic/hydrophilic interfaces. The re-  
374 sulting hydrophobin monolayer can modify the properties of the surface to which it adheres. Al-  
375 teration of surface properties of materials by hydrophobins enable fungi to interact with previously  
376 intractable material as well as adapt to environmental changes. In this study, this phenomenon was  
377 demonstrated with HFB9A, as this hydrophobin is required for efficient colonization of maize  
378 roots and enhancement of cell wall degrading enzymes activity. Remarkably, ISR in maize treated  
379 with  $\Delta hfb9a$  deletion mutant strains was reduced, and in addition to reduced root colonization, one  
380 other potential mode of action of HFB9A on ISR may be due to the ability of the purified protein  
381 to induce activation of MAP kinase cascade, similarly to other MAMPs such as chitin.

382 It is not unprecedented that a hydrophobin may act as an elicitor of immunity to influence  
383 plant health. HYTLO1 was demonstrated to have a role in induced systemic resistance when ap-  
384 plied to leaves, as well as when expressed transgenically in tomato plants (Ruocco *et al.*, 2015).  
385 The hydrophobin HFB9A may be functioning in a similar manner as a MAMP. AtMAPK3/6 pro-  
386 teins associated with MAMP response and innate immunity were phosphorylated after seedling  
387 treatment with purified HFB9A. The phosphorylation cascade starting with AtMAPK3/6 activates  
388 WRKY transcription factors involved in plant innate immunity (Adachi *et al.*, 2015). The direct

389 activation of these proteins by purified HFB9A suggests that the fungal protein is recognized by  
390 the plant as non-self and induces defense responses. This result represents the first direct evidence  
391 of MAMP activity by a hydrophobin through induction of MAPK signaling cascades. Another  
392 protein with putative MAMP activity from *Trichoderma spp.* is SWOLLENIN from *T. asperellum*  
393 (Brotman *et al.*, 2008). Brotman *et al.* suggested that the carbohydrate binding domain of the pro-  
394 tein acted as a MAMP, but they did not provide direct evidence, such as MAPK phosphorylation.  
395 Additionally, the production of SM1, a known elicitor of ISR, remained unchanged in the mutant  
396 strains in the presence of plant roots. However, there was an apparent difference in the dimerization  
397 of SM1 between the mutants and wild-type strains. The ability of SM1 to reduce disease progres-  
398 sion by *C. graminicola* on maize leaves was shown to be affected by its dimerization state (Vargas  
399 *et al.*, 2008). Vargas *et al.* also hypothesized that glycosylation influenced the ability of SM1 to  
400 form dimers. It is tempting to speculate that HFB9a also influences aggregation of SM1, thus al-  
401 tering the plant response to the fungus. Remarkably, SM1 application to seedlings did not induce  
402 phosphorylation of MAPK proteins. This demonstrates, therefore, that the mechanism by which  
403 SM1 and HFB9A induce plant innate immunity is different at the molecular level. Further, it sug-  
404 gests that SM1 may not be perceived as a MAMP but rather may act via as yet unknown mecha-  
405 nisms, potentially even as intracellular effector. SM1 and HYTLO1 have both been demonstrated  
406 to induce defense responses when applied to foliage (Djonović *et al.*, 2006b, Ruocco *et al.*, 2015).  
407 The lack of MAPK activation by SM1 suggests that HYTLO1 may induce defense more similarly  
408 to SM1 rather than act as a MAMP as previously hypothesized. The activation of MAPK signaling  
409 cascades by HFB9A, paired with decreased ISR as measured by foliar lesion size in plants treated  
410 with *HFB9a* deletion mutant strains, strongly suggests that HFB9A acts as a MAMP.

411 Our initial hypothesis was that HFB9A mediates attachment of hyphae to maize roots in a  
412 manner similar to TASHYD1 (Viterbo and Chet, 2006). However, based on observations of the  
413 attachment phenomenon in hydroponics systems and the timing of expression of the gene, this  
414 hypothesis is rejected. There is previous evidence that hydrophobins of both classes from *T. virens*  
415 enhance polyethylene terephthalate plastic degradation by cutinases (Przylucka *et al.*, 2014). The  
416 enzymatic enhancement of cellulases by HFB9A may aid the fungus in the degradation of plant  
417 cell walls, promoting colonization. The demonstrated reduction in cellulase enzyme activity and  
418 colonization by the  $\Delta hfb9a$  deletion mutants suggest this may be an additional role for some hy-  
419 drophobins. The ability of HFB9A to enhance enzyme activity of cellulases and chitinases, but not  
420 other cell wall degrading enzymes such as pectinases may be due to the solubility of the substrates.  
421 Cellulose and chitin are both insoluble in water, whereas pectin is highly soluble. We speculate  
422 that HFB9A may be aiding the solubility of the substrates that the enzymes are acting upon, pro-  
423 moting enzyme attack. Beyond its biological role in the fungus, HFB9A could present a possibility  
424 for application in an industrial setting. Fungal hydrophobins are increasingly being used in com-  
425 mercial applications, such as in the protection of historic stonework from water damage (Winandy  
426 *et al.*, 2019). The cellulase and chitinase enhancement activity of HFB9A makes it a viable candi-  
427 date for industrial applications, e.g. as an additive to enzyme cocktails.

428 Interestingly, the reduction in chitinase activity in  $\Delta hfb9a$  mutants did not influence the  
429 ability of the fungus to directly protect against *R. solani* infection of cotton roots, nor mycopara-  
430 sitism of *P. ultimum* as measured by confrontation assays. It is possible that the minimal growth  
431 medium utilized to express cell wall degrading enzymes may not have been optimal for production  
432 of chitinases involved in mycoparasitism. A medium containing colloidal chitin or fungal cell  
433 walls might have been more appropriate for the production of mycoparasitism related chitinases.

434 Additionally, secondary metabolites such as gliotoxin and viridin have been demonstrated to have  
435 activity against both *R. solani* and *P. ultimum* (Howell *et al.*, 1993; Vargas *et al.*, 2014). The low-  
436 ered activity of chitinases may be compensated by the activity of the antifungal secondary metab-  
437 olites.

438 Overall, we demonstrate that HFB9A has an important role in the interaction between *T.*  
439 *virens* and its host. ISR is significantly reduced when HFB9A is not produced and the protein  
440 induces phosphorylation of MAPK proteins involved in immune responses, suggesting that  
441 HFB9A may function as a MAMP to activate ISR. Furthermore, the purified protein enhances the  
442 cell wall degrading activity of several cell wall degrading enzymes and has potential industrial  
443 applications.

#### 444 **Acknowledgements**

445 This work was funded by the Binational Science Foundation (Grant #2013202) awarded to CMK  
446 and BAH and USDA-NIFA (2016-67013-24730) awarded to CMK and MVK.

#### 447 **References**

- 448 Adachi, H., Nakano, T., Miyagawa, N., Ishihama, N., Yoshioka, M., Katou, Y., *et al.* (2015)  
449 Wrky transcription factors phosphorylated by mapk regulate a plant immune nadph oxidase in  
450 nicotiana benthamiana. *Plant Cell* **27**: 2645–2663.
- 451 Bayry, J., Aimanianda, V., Guijarro, J.I., Sunde, M., and Latgé, J.P. (2012) Hydrophobins-  
452 unique fungal proteins. *PLoS Pathog* **8**: e1002700  
453 <http://dx.plos.org/10.1371/journal.ppat.1002700>. Accessed July 29, 2016.
- 454 Bignell, E. (2012) The Molecular Basis of pH Sensing, Signaling, and Homeostasis in Fungi. In  
455 *Advances in Applied Microbiology*. Academic Press Inc., pp. 1–18.
- 456 Brotman, Y., Briff, E., Viterbo, A., and Chet, I. (2008) Role of swollenin, an expansin-like

457 protein from Trichoderma, in plant root colonization. *Plant Physiol* **147**: 779–789  
458 <http://www.pubmedcentral.nih.gov/articlerender.fcgi?artid=2409044&tool=pmcentrez&renderty>  
459 [pe=abstract](#). Accessed November 13, 2015.

460 Correia, I., Prieto, D., Alonso-Monge, R., Pla, J., and Román, E. (2017) *The MAP Kinase*  
461 *Network As the Nervous System of Fungi*. Elsevier, .

462 Crutcher, F.K., Moran-Diez, M.E., Ding, S., Liu, J., Horwitz, B.A., Mukherjee, P.K., and  
463 Kenerley, C.M. (2015) A paralog of the proteinaceous elicitor SM1 is involved in colonization of  
464 maize roots by Trichoderma virens. *Fungal Biol* **119**: 476–486.

465 Djonović, S., Pozo, M.J., Dangott, L.J., Howell, C.R., and Kenerley, C.M. (2006a) Sm1, a  
466 proteinaceous elicitor secreted by the biocontrol fungus Trichoderma virens induces plant  
467 defense responses and systemic resistance. *Mol Plant-Microbe Interact* **19**: 838–853  
468 <http://apsjournals.apsnet.org/doi/abs/10.1094/MPMI-19-0838>. Accessed August 31, 2016.

469 Djonović, S., Pozo, M.J., and Kenerley, C.M. (2006b) Tvbg3, a  $\beta$ -1,6-glucanase from the  
470 biocontrol fungus Trichoderma virens, is involved in mycoparasitism and control of Pythium  
471 ultimum. *Appl Environ Microbiol* **72**: 7661–7670.

472 Djonović, S., Vargas, W.A., Kolomiets, M. V., Horndeski, M., Wiest, A., and Kenerley, C.M.  
473 (2007) A proteinaceous elicitor Sm1 from the beneficial fungus Trichoderma virens is required  
474 for induced systemic resistance in Maize. *Plant Physiol* **145**: 875–889  
475 <http://www.plantphysiol.org/cgi/doi/10.1104/pp.107.103689>. Accessed October 4, 2016.

476 Guzmán-Guzmán, P., Alemán-Duarte, M.I., Delaye, L., Herrera-Estrella, A., and Olmedo-  
477 Monfil, V. (2017) Identification of effector-like proteins in Trichoderma spp. and role of a  
478 hydrophobin in the plant-fungus interaction and mycoparasitism. *BMC Genet* **18**: 16  
479 <http://www.ncbi.nlm.nih.gov/pubmed/28201981>. Accessed September 17, 2018.

480 Howell, C.R. (1987) Relevance of Mycoparasitism in the Biological Control of *Rhizoctonia*  
481 *solani* by *Gliocladium virens*. *Phytopathology* **77**: 992–994.

482 Howell, C.R., Stipanovic, R.D., and Lumsden, R.D. (1993) Antibiotic Production by Strains of  
483 *Gliocladium virens* and its Relation to the Biocontrol of Cotton Seedling Diseases. *Biocontrol*  
484 *Sci Technol* **3**: 435–441 <http://www.tandfonline.com/doi/abs/10.1080/09583159309355298>.  
485 Accessed June 6, 2019.

486 Joensuu, J.J., Conley, A.J., Lienemann, M., Brandle, J.E., Linder, M.B., and Menassa, R. (2010)  
487 Hydrophobin fusions for high-level transient protein expression and purification in *Nicotiana*  
488 *benthamiana*. *Plant Physiol* **152**: 622–33 <http://www.ncbi.nlm.nih.gov/pubmed/20018596>.  
489 Accessed March 31, 2017.

490 Kim, K.T., Jeon, J., Choi, J., Cheong, K., Song, H., Choi, G., *et al.* (2016) Kingdom-wide  
491 analysis of fungal small secreted proteins (SSPs) reveals their potential role in host association.  
492 *Front Plant Sci* **7**.

493 Lamdan, N.L., Shalaby, S., Ziv, T., Kenerley, C.M., and Horwitz, B.A. (2015) Secretome of  
494 *Trichoderma* interacting with maize roots: Role in induced systemic resistance. *Mol Cell*  
495 *Proteomics* **14**: 1054–1063 <http://www.mcponline.org/content/14/4/1054.abstract?etoc>.

496 Li, B., Jiang, S., Yu, X., Cheng, C., Chen, S., Cheng, Y., *et al.* (2015) Phosphorylation of trihelix  
497 transcriptional repressor ASR3 by MAP KINASE4 negatively regulates arabidopsis immunity.  
498 *Plant Cell* **27**: 839–856.

499 Malinich, E.A., Wang, K., Mukherjee, P.K., Kolomiets, M., and Kenerley, C.M. (2019)  
500 Differential expression analysis of *Trichoderma virens* RNA reveals a dynamic transcriptome  
501 during colonization of *Zea mays* roots. *BMC Genomics* **20**: 280  
502 <https://bmcgenomics.biomedcentral.com/articles/10.1186/s12864-019-5651-z>. Accessed August

503 13, 2019.

504 Morán-Diez, M.E., Trushina, N., Lamdan, N.L., Rosenfelder, L., Mukherjee, P.K., Kenerley,  
505 C.M., and Horwitz, B.A. (2015) Host-specific transcriptomic pattern of during interaction with  
506 maize or tomato roots. *BMC Genomics* **16**: 8 <http://www.ncbi.nlm.nih.gov/pubmed/25608961>.  
507 Accessed August 31, 2016.

508 Morris, V.K., Kwan, A.H., and Sunde, M. (2013) Analysis of the structure and conformational  
509 states of DewA gives insight into the assembly of the fungal hydrophobins. *J Mol Biol* **425**: 244–  
510 256 <https://www.sciencedirect.com/science/article/pii/S0022283612008546?via%3Dihub>.  
511 Accessed February 20, 2018.

512 Mustalahti, E., Saloheimo, M., and Joensuu, J.J. (2013) Intracellular protein production in  
513 *Trichoderma reesei* (*Hypocrea jecorina*) with hydrophobin fusion technology. *N Biotechnol* **30**:  
514 262–268.

515 Paz, Z., García-Pedrajas, M.D., Andrews, D.L., Klosterman, S.J., Baeza-Montañez, L., and Gold,  
516 S.E. (2011) One Step Construction of Agrobacterium-Recombination-ready-plasmids (OSCAR),  
517 an efficient and robust tool for ATMT based gene deletion construction in fungi. *Fungal Genet*  
518 *Biol* **48**: 677–684.

519 Pieterse, C.M.J., Zamioudis, C., Berendsen, R.L., Weller, D.M., Wees, S.C.M. Van, and Bakker,  
520 P.A.H.M. (2014) Induced Systemic Resistance by Beneficial Microbes. *Annu Rev Phytopathol*  
521 **52**: 347–375.

522 Przylucka, A., Ribitsch, D., Herrero-Acero, E., Gübitz, G., Kubicek, C.P., and Druzhinina, I.  
523 (2014) Hydrophobins class I versus class II: *Trichoderma virens* HFB9a and HFB9b (class I) are  
524 more effective as enhancing agents in enzymatic PET hydrolysis and surface modulators  
525 compared to HFB4 and HFB7 (class II). *N Biotechnol* **31**: S190

526 <https://www.sciencedirect.com/science/article/pii/S1871678414009972?via%3Dihub>. Accessed  
527 August 17, 2018.

528 Ramírez-Valdespino, C.A., Casas-Flores, S., and Olmedo-Monfil, V. (2019) Trichoderma as a  
529 model to study effector-like molecules. *Front Microbiol* **10**: 1030.

530 Ruocco, M., Lanzuise, S., Lombardi, N., Woo, S.L., Vinale, F., Marra, R., *et al.* (2015) Multiple  
531 Roles and Effects of a Novel Trichoderma Hydrophobin. *Mol Plant-Microbe Interact* **28**: 167–  
532 179.

533 Saldajeno, M.G.B., Naznin, H.A., Elsharkawy, M.M., Shimizu, M., and Hyakumachi, M. (2014)  
534 Enhanced Resistance of Plants to Disease Using Trichoderma spp. In *Biotechnology and Biology*  
535 *of Trichoderma*. pp. 477–493.

536 Schneider, C.A., Rasband, W.S., and Eliceiri, K.W. (2012) NIH Image to ImageJ: 25 years of  
537 image analysis. *Nat Methods* **9**: 671–675.

538 Seidl-Seiboth, V., Gruber, S., Sezerman, U., Schwecke, T., Albayrak, A., Neuhoof, T., *et al.*  
539 (2011) Novel hydrophobins from trichoderma define a new hydrophobin subclass: Protein  
540 properties, evolution, regulation and processing. *J Mol Evol* **72**: 339–351  
541 <http://link.springer.com/10.1007/s00239-011-9438-3>. Accessed July 21, 2016.

542 Vargas, W.A., Djonović, S., Sukno, S.A., and Kenerley, C.M. (2008) Dimerization controls the  
543 activity of fungal elicitors that trigger systemic resistance in plants. *J Biol Chem* **283**: 19804–  
544 19815.

545 Vargas, W.A., Mukherjee, P.K., Laughlin, D., Wiest, A., Moran-Diez, M.E., and Kenerley, C.M.  
546 (2014) Role of gliotoxin in the symbiotic and pathogenic interactions of *Trichoderma virens*.  
547 *Microbiol (United Kingdom)* **160**: 2319–2330.

548 Viterbo, A., and Chet, I. (2006) TasHyd1, a new hydrophobin gene from the biocontrol agent



549 Trichoderma asperellum, is involved in plant root colonization. *Mol Plant Pathol* **7**: 249–258  
550 <http://doi.wiley.com/10.1111/j.1364-3703.2006.00335.x>. Accessed August 2, 2016.

551 Winandy, L., Schlebusch, O., and Fischer, R. (2019) Fungal hydrophobins render stones  
552 impermeable for water but keep them permeable for vapor. *Sci Rep* **9**: 6264  
553 <http://www.nature.com/articles/s41598-019-42705-w>. Accessed July 12, 2019.

554 Wösten, H. a (2001) Hydrophobins: multipurpose proteins. *Annu Rev Microbiol* **55**: 625–646.

555 Wosten, H., Vries, O. De, and Wessels, J. (1993) Interfacial Self-Assembly of a Fungal  
556 Hydrophobin into a Hydrophobic Rodlet Layer. *Plant Cell* **5**: 1567–1574  
557 <http://www.ncbi.nlm.nih.gov/pubmed/12271047>. Accessed April 3, 2017.

558 Wösten, H.A.B., and Vocht, M.L. De (2000) Hydrophobins, the fungal coat unravelled. *Biochim*  
559 *Biophys Acta - Rev Biomembr* **1469**: 79–86 <http://www.ncbi.nlm.nih.gov/pubmed/10998570>.  
560 Accessed January 12, 2017.

561 Yang, J., Yan, R., Roy, A., Xu, D., Poisson, J., and Zhang, Y. (2014) The I-TASSER suite:  
562 Protein structure and function prediction. *Nat Methods* **12**: 7–8  
563 <http://www.nature.com/articles/nmeth.3213>. Accessed April 4, 2018.

564 Zampieri, F., Wösten, H.A.B., and Scholtmeijer, K. (2010) Creating surface properties using a  
565 palette of hydrophobins. *Materials (Basel)* **3**: 4607–4625.

566

567 **Figures and legends**

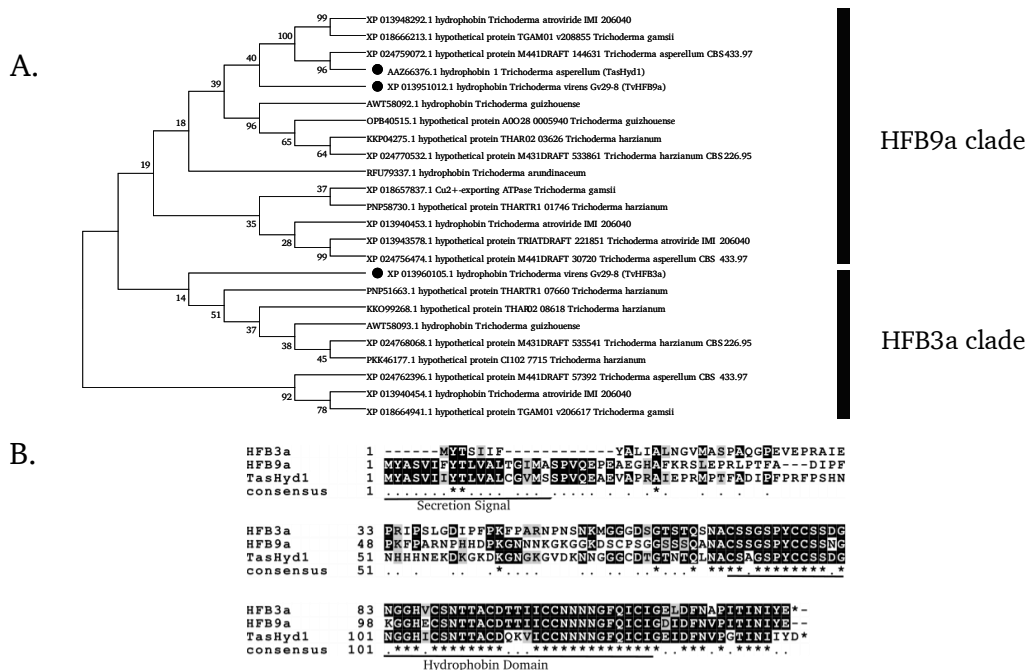

568

569 **Figure 1.** Phylogenetic comparison of hydrophobins from *Trichoderma* spp. **A.** A phylogenetic

570 tree of class I hydrophobins from *Trichoderma* spp. produced with MEGA software. **B.** A Clustal-

571 Omega alignment of the amino acid sequences of two *T. virens* class I hydrophobins (HFB9a and

572 HFB3a) and TASHYD1 from *T. asperellum*. The residues that make up the N-terminal secretion

573 signal and hydrophobin core are labeled with an underline. Identical residues between all three

574 sequences are labeled with an asterisk.

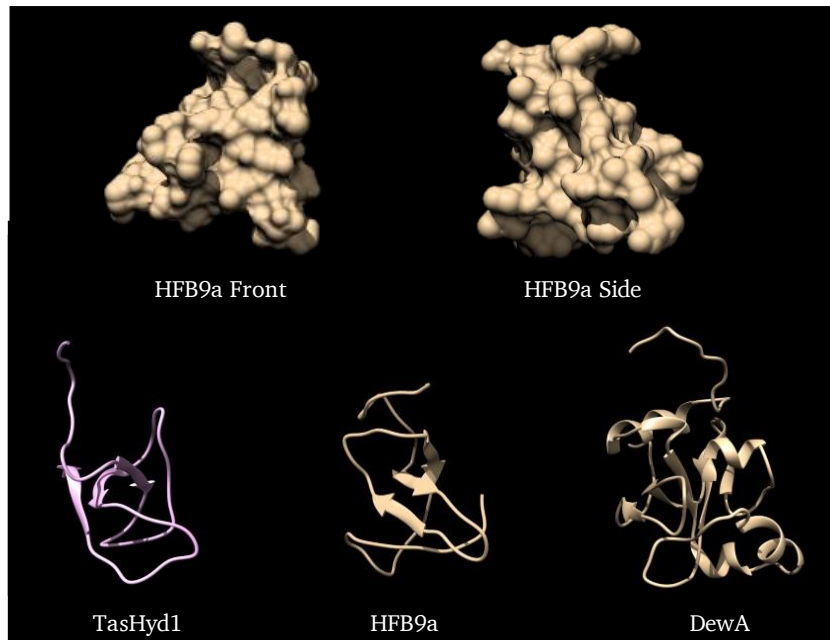

575

576 **Figure 2.** A comparison of the predicted protein structures of TASHYD1, HFB9a, and the solved  
577 structure of DEWA, a class I hydrophobin from *Aspergillus nidulans*. Both HFB9A and  
578 TASHYD1 successfully model as similar to the solved structure of DEWA from *Aspergillus nid-*  
579 *ulans* (Morris *et al.*, 2013) showing the similar core of beta-sheets, with the unique composition  
580 of the surface residues most likely responsible for the specific functions.

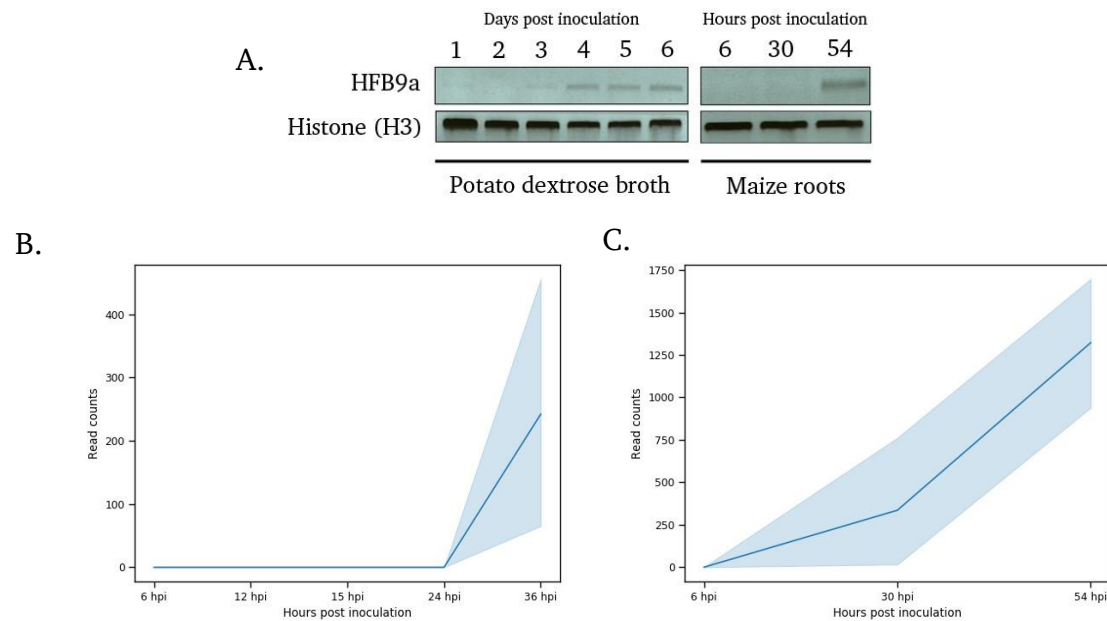

581

582 **Figure 3.** Expression profiling of *hfb9a* **A.** *hfb9a* expression in potato dextrose broth and in the  
583 presence of maize roots as measured by RT-PCR. Histone (H3) was used as a loading control. **B**  
584 **and C.** Normalized read counts from RNA-seq based transcriptomic datasets plotted across time  
585 (B: Taylor *et al.* unpublished, C: Malinich *et al.*, 2019). Raw read counts were obtained from the  
586 mentioned studies, then normalized and graphed in EdgeR and Python, respectively. The light  
587 colored, shaded regions along the line graph represent the standard deviation at each time point.

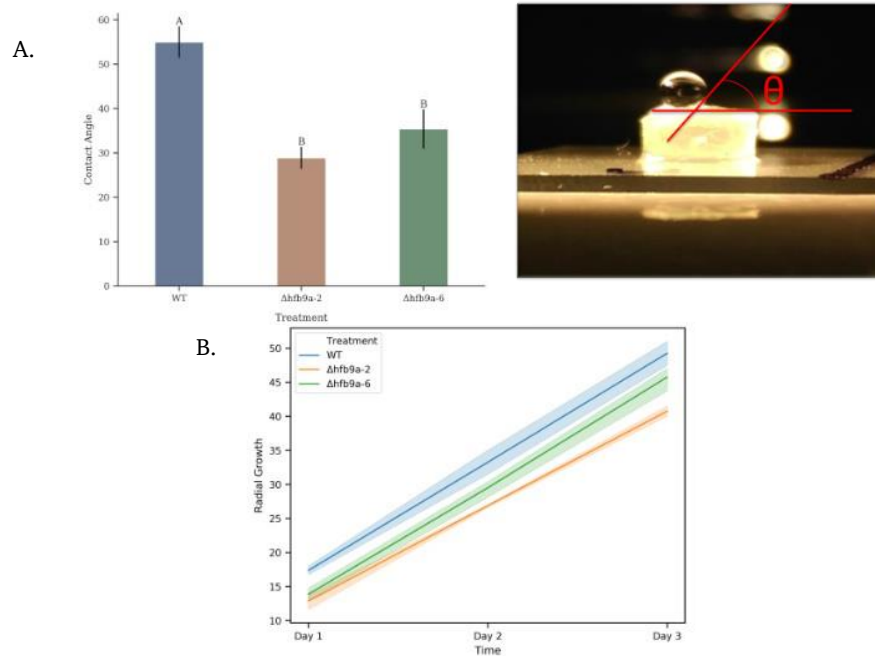

588

589 **Figure 4.** Surface hydrophobicity and oxidative stress response. **A.** Surface hydrophobicity of fun-  
590 ginal mycelium as measured by contact angle of a water droplet as it lay on the surface of mycelium.  
591 Different letters represent statistically different groups ( $p < 0.05$ ) as determined by ANOVA and  
592 Tukey's HSD. Error bars indicate standard deviation. **B.** Radial growth of each strain over the  
593 course of three days on PDA amended with sodium menadione bisulfite to induce oxidative stress.  
594 Colored, shaded regions indicate standard deviation.

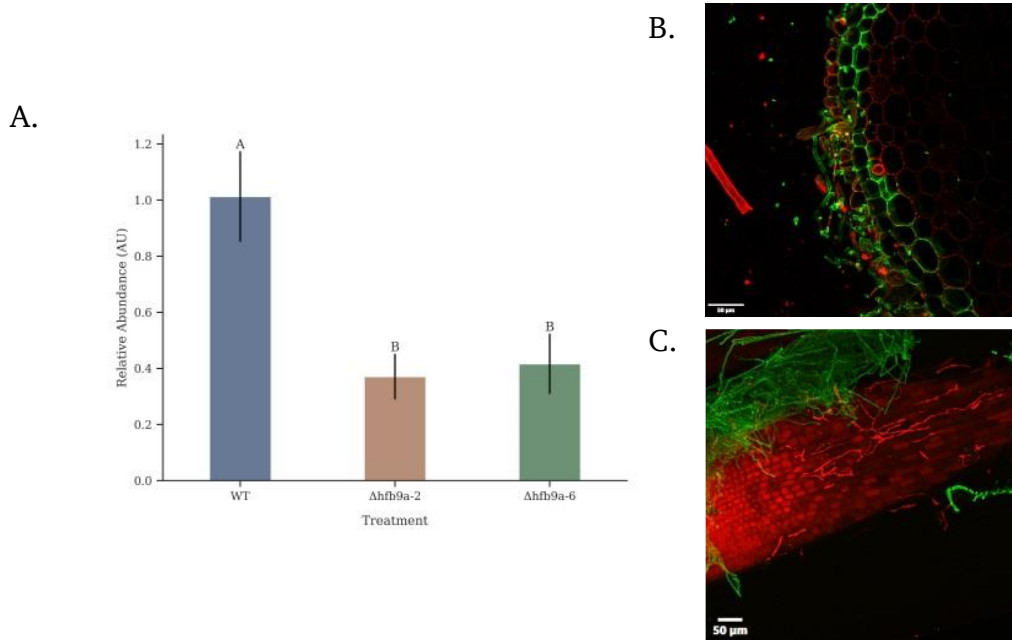

595

596 **Figure 5.** Root colonization of maize. **A.** Root colonization of maize roots in a hydroponic system  
597 by different strains of *T. virens*. Quantitative-PCR was used to determine the relative abundance  
598 of fungal DNA compared to maize DNA and normalized to the wild-type strain. A smaller number  
599 represents less colonization of maize roots by the fungus compared to the wild-type strain. Differ-  
600 ent letters represent statistically different groups ( $p < 0.05$ ) as determined by ANOVA and Tukey's  
601 HSD. Error bars indicate standard deviation. **B and C.** Confocal micrographs visualizing the wild-  
602 type strain (**B**) or  $\Delta hfb9a$  mutant strain (**C**) colonizing maize roots. Fungal tissue was stained with  
603 WGA-AlexaFluor-488 (green) and maize tissue was stained with propidium iodide (red). Individ-  
604 ual hyphae can be seen in the intercellular spaces of the plant cells colonized by the wild-type  
605 strain. In contrast, the only observable hyphae present were extracellularly attached to the surface  
606 of roots colonized by  $\Delta hfb9a$  mutant strains.

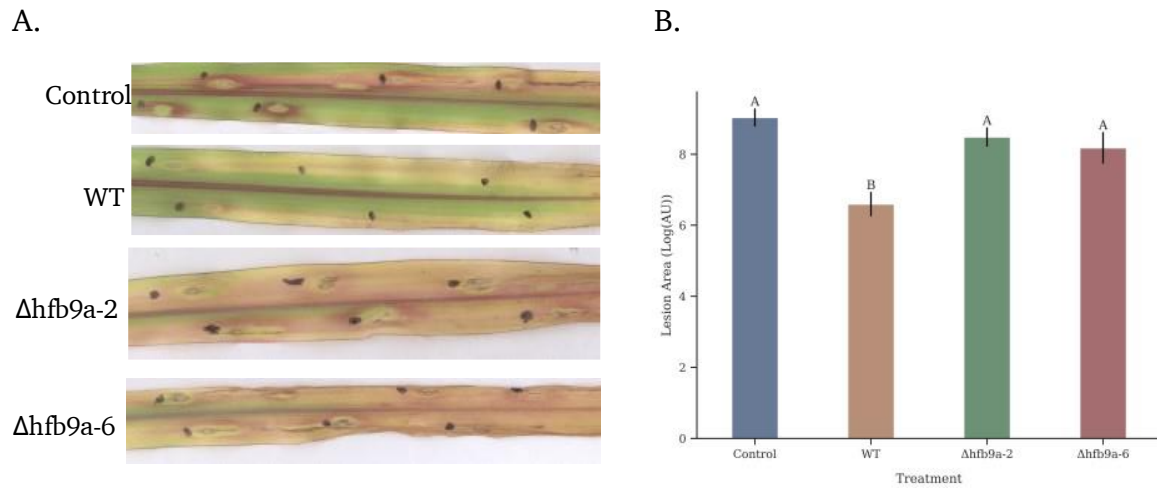

607

608 **Figure 6.** Induced systemic resistance of maize plants treated with the wild-type strain or  $\Delta$ hfb9a  
609 deletion mutants. Areas of individual lesions were measured in ImageJ. Different letters represent  
610 statistically different groups ( $p < 0.05$ ) as determined by ANOVA and Tukey's HSD. Error bars  
611 indicate standard deviation.

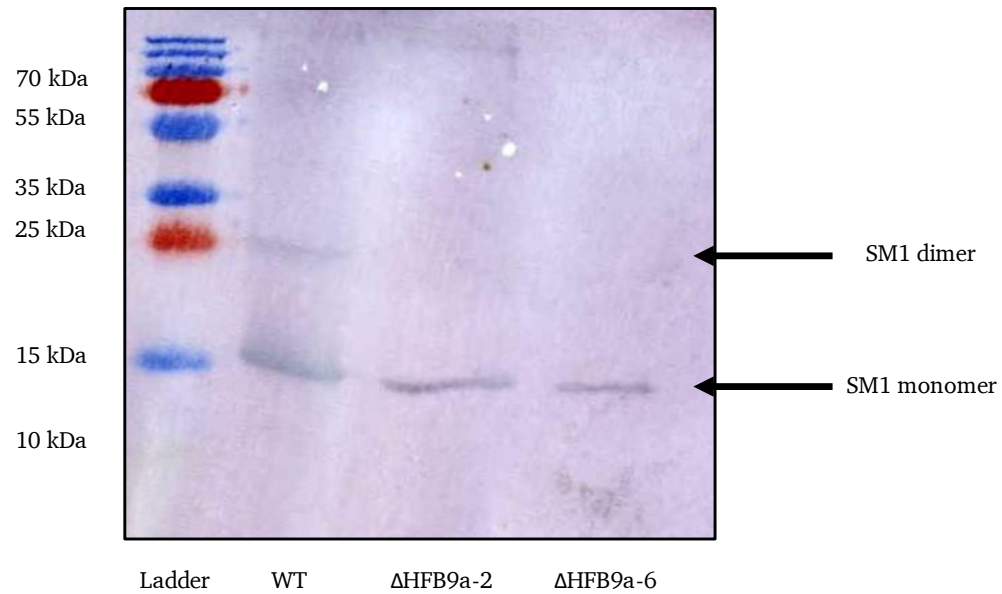

612

613 **Figure 7.** SM1 protein production. A western blot using antibodies specific to SM1 to determine  
614 the production of SM1 protein by the wild-type strain and deletion mutants ( $\Delta$ hfb9a-2 and  $\Delta$ hfb9a-  
615 6). All lanes were loaded with one ug of protein. There was no discernable difference in production  
616 of SM1 between the mutants and wild-type strains.



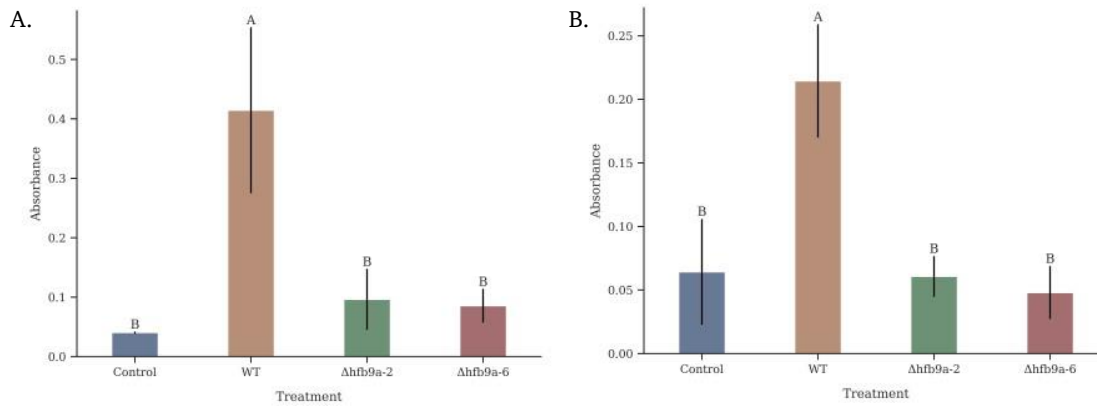

617

618 **Figure 8.** Enzyme activity determination. Cellulase (A) or chitinase (B) activity of culture filtrates  
619 from the wild-type strain and  $\Delta hfb9a$  deletion mutants as measured by the DNS assay. In each  
620 assay, the wild-type strain exhibited significantly higher enzymatic activity on cellulose and col-  
621 loidal chitin (A and B, respectively). Different letters represent statistically different groups ( $p <$   
622  $0.05$ ) as determined by ANOVA and Tukey's HSD. Error bars indicate standard deviation.

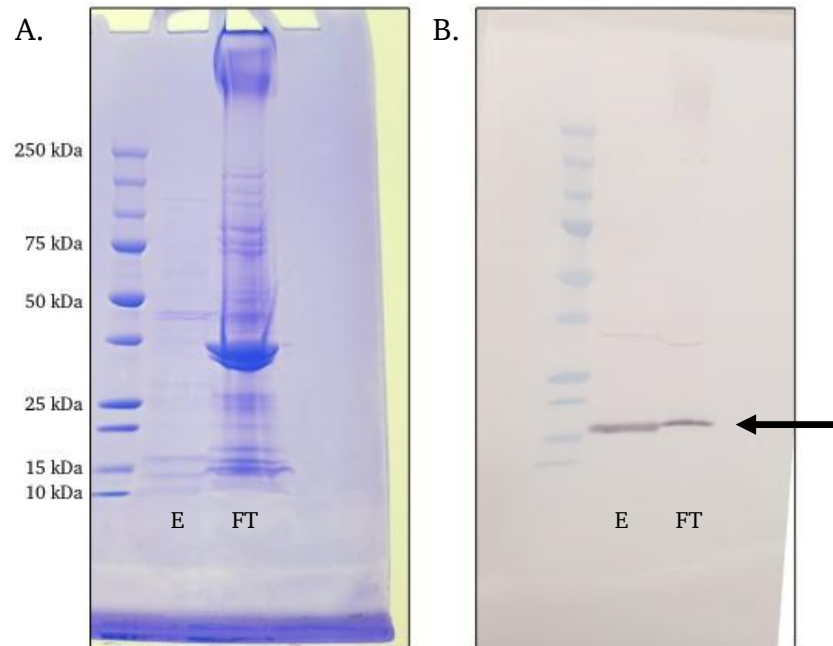

623

624 **Figure 9.** Detection of recombinant HFB9A. Coomassie Blue stained SDS-PAGE gel (A) and  
625 western blot (B) with antibodies specific to the H6 tag to detect recombinant HFB9A. E: eluted  
626 fraction, FT: column flowthrough prior to elution. The arrow indicates the band corresponding to  
627 recombinant HFB9A protein.

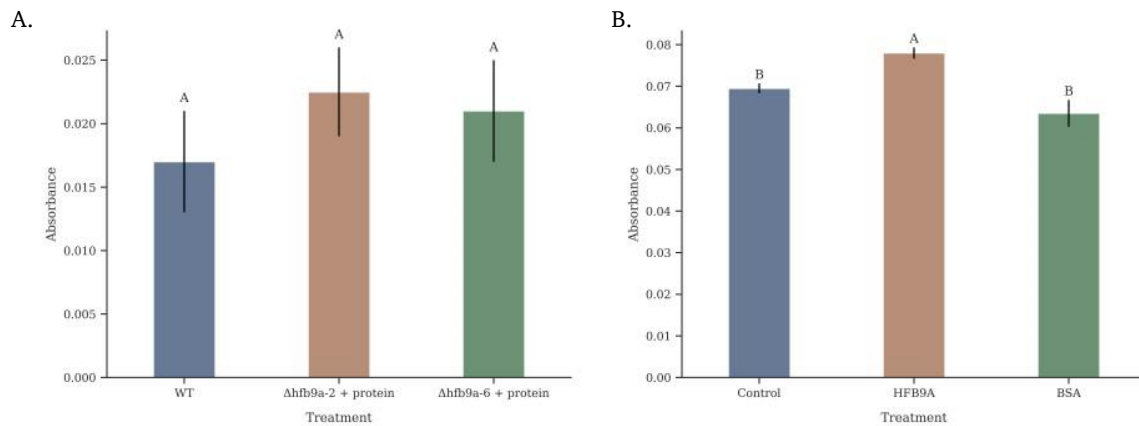

628

629 **Figure 10.** Enhancement of enzyme activity by recombinant HFB9A. **A.** Complementation of  
630  $\Delta hfb9a$  deletion mutant cellulase activity by addition of purified HFB9A protein. Cellulase activity  
631 was measured by the DNS assay with a cellulose substrate. **B.** Enhancement of commercial cellu-  
632 lase with purified HFB9A protein. BSA treatment was included as a control at the same molar  
633 concentration as HFB9A. Different letters represent statistically different groups ( $p < 0.05$ ) as de-  
634 termined by ANOVA and Tukey's HSD. Error bars indicate standard deviation.

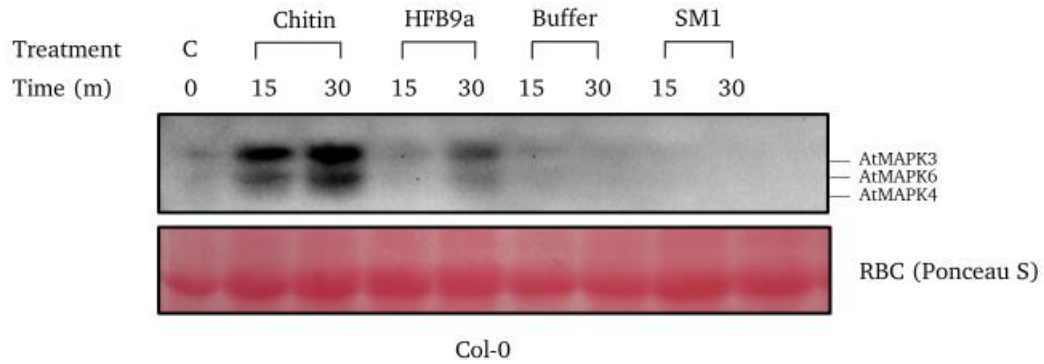

635

636 **Figure 11.** MAMP recognition by *Arabidopsis thaliana*. MAPK phosphorylation of *Arabidopsis*  
637 by addition of HFB9A over the course of 15- and 30-min. Phosphorylation was detected by anti-  
638 bodies specific to pERK1/2. Chitin was included as a positive control.
